# Supplementary material
Source: publisher site journal article supplement (https://www.dovepress.com/article/377464)
Supplement: Supplementary file 1 [file get_supplementary_file.php]

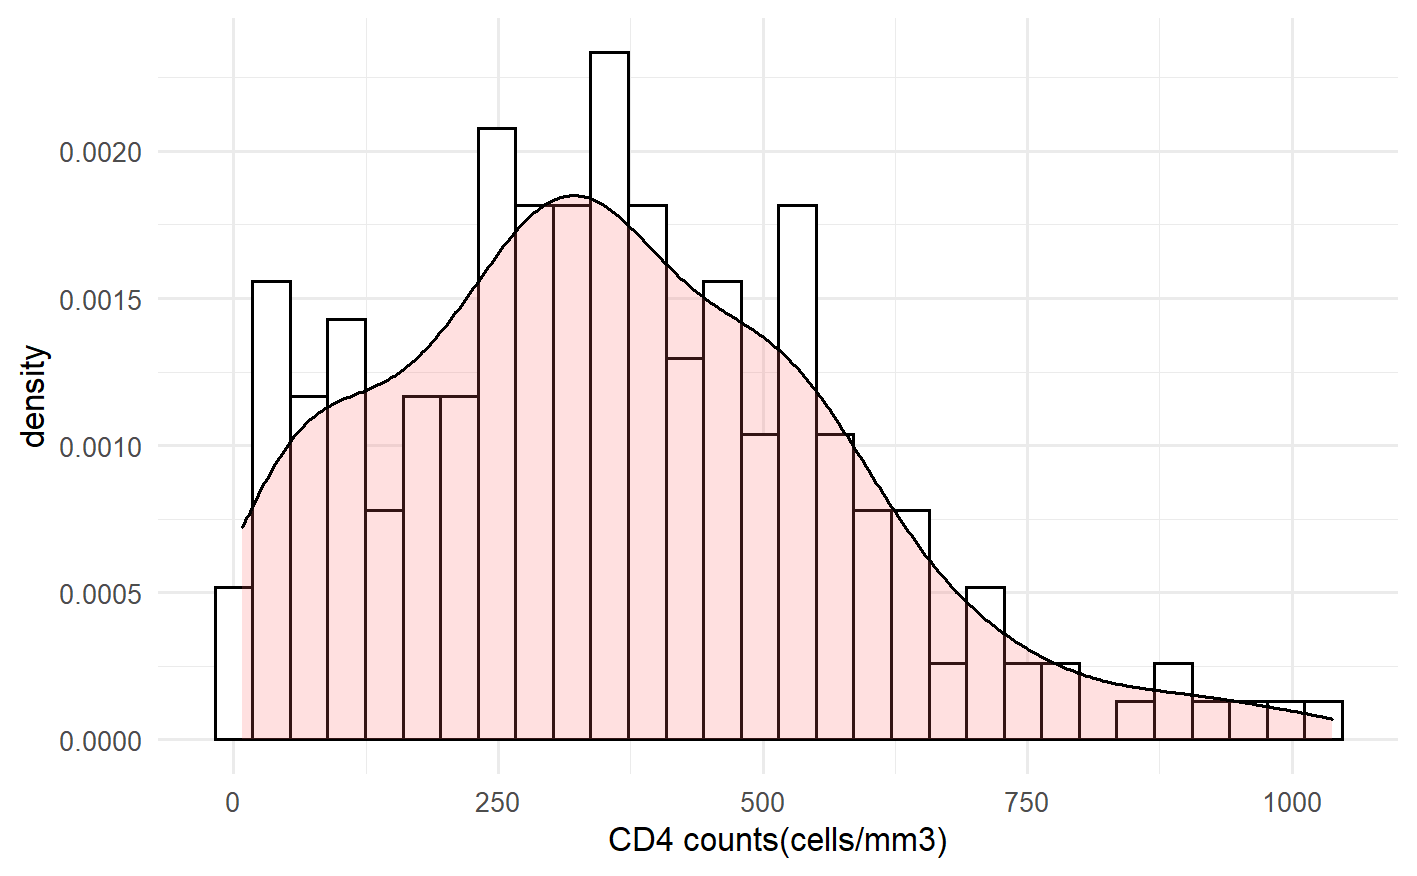


Supplementary Figure 1. The distribution curve of CD4 counts at baseline among persons newly diagnosed with HIV
